# Supplementary material for: Effect of Sodium Benzoate on Cognitive Function Among Patients With Behavioral and Psychological Symptoms of Dementia: Secondary Analysis of a Randomized Clinical Trial
Source: PubMed Central journal article supplement (PMC8060832; doi:10.1001/jamanetworkopen.2021.6156), 2021-04-21

## Supplemental Online Content

Lin CH, Chen PK, Wang SH, Lane HY. Effect of sodium benzoate on cognitive function among patients with behavioral and psychological symptoms of dementia: secondary analysis of a randomized clinical trial. *JAMA Netw Open*. 2021;4(4):e216156. doi:10.1001/jamanetworkopen.2021.6156

**eTable.** Measures of BEHAVE-AD Over the 6-week Treatment Using Generalized Estimating Equations (GEE) Method

**eFigure.** Participant Flow Diagram

This supplemental material has been provided by the authors to give readers additional information about their work.

**eTable 1. Measures of BEHAVE-AD Over the 6-week Treatment Using Generalized Estimating Equations (GEE) Method**

|                 | Sodium benzoate<br>Mean ± SD (n) | Placebo<br>Mean ± SD (n) | Estimate* | S.E.   | Z     | P Value |
|-----------------|----------------------------------|--------------------------|-----------|--------|-------|---------|
| <b>Male</b>     |                                  |                          |           |        |       |         |
| Baseline        | 9.9 ± 7.7 (19)                   | 12.1 ± 11.4 (16)         |           |        |       |         |
| Week 2          | 6.7 ± 5.4 (19)                   | 9.9 ± 9.6 (16)           | -2.2613   | 1.6116 | -1.40 | .16     |
| Week 4          | 6.3 ± 4.1 (18)                   | 6.9 ± 4.4 (13)           | -3.0315   | 1.4326 | -2.12 | .03     |
| Week 6          | 5.5 ± 4.0 (17)                   | 5.2 ± 3.6 (12)           | -4.4082   | 2.0246 | -2.18 | .03     |
| Endpoint        | 5.9 ± 4.2 (19)                   | 7.9 ± 9.0 (16)           | -3.8801   | 1.9549 | -1.98 | .05     |
| Drug            |                                  |                          | -1.7591   | 3.0768 | -0.57 | .57     |
| Week 2 x drug   |                                  |                          | -1.0261   | 1.9078 | -0.54 | .59     |
| Week 4 x drug   |                                  |                          | -0.2501   | 1.8403 | -0.14 | .89     |
| Week 6 x drug   |                                  |                          | 0.3176    | 2.4168 | 0.13  | .90     |
| Endpoint x drug |                                  |                          | -0.1185   | 2.3385 | -0.05 | .96     |
| <b>Female</b>   |                                  |                          |           |        |       |         |
| Baseline        | 11.3 ± 8.2 (30)                  | 10.8 ± 7.8 (32)          |           |        |       |         |
| Week 2          | 10.0 ± 8.8 (30)                  | 9.5 ± 6.5 (31)           | -1.4534   | 0.6349 | -2.29 | .02     |
| Week 4          | 10.2 ± 8.2 (25)                  | 6.9 ± 4.7 (28)           | -3.5276   | 0.9680 | -3.64 | <.001   |
| Week 6          | 8.1 ± 6.8 (24)                   | 8.3 ± 6.8 (29)           | -1.9142   | 0.9751 | -1.96 | .05     |
| Endpoint        | 9.6 ± 8.9 (30)                   | 8.9 ± 7.1 (32)           | -1.8629   | 0.9149 | -2.04 | .04     |
| Drug            |                                  |                          | 0.4391    | 1.9596 | 0.22  | .82     |
| Week 2 x drug   |                                  |                          | 0.0948    | 1.1502 | 0.08  | .93     |
| Week 4 x drug   |                                  |                          | 3.0225    | 1.4650 | 2.06  | .04     |
| Week 6 x drug   |                                  |                          | 0.1928    | 1.5394 | 0.13  | .90     |
| Endpoint x drug |                                  |                          | 0.2565    | 1.4637 | 0.18  | .86     |

\* Estimate is the coefficient of treatment-visit interaction term in the GEE method with treatment, visit and treatment-visit interaction as covariates; baseline value as the reference. No imputation for the incomplete data was used. An autoregressive AR(1) covariance matrix was fit to the within-patient repeated measures. P values were based on two-tailed tests.

In the “Estimate” column for BEHAVE-AD, the upper 4 rows are for the placebo group only, while the bottom 5 are for benzoate, placebo interaction terms.

Abbreviations: BEHAVE-AD, Behavioral Pathology in Alzheimer's Disease Rating Scale.

**eFigure 1. Participant Flow Diagram**

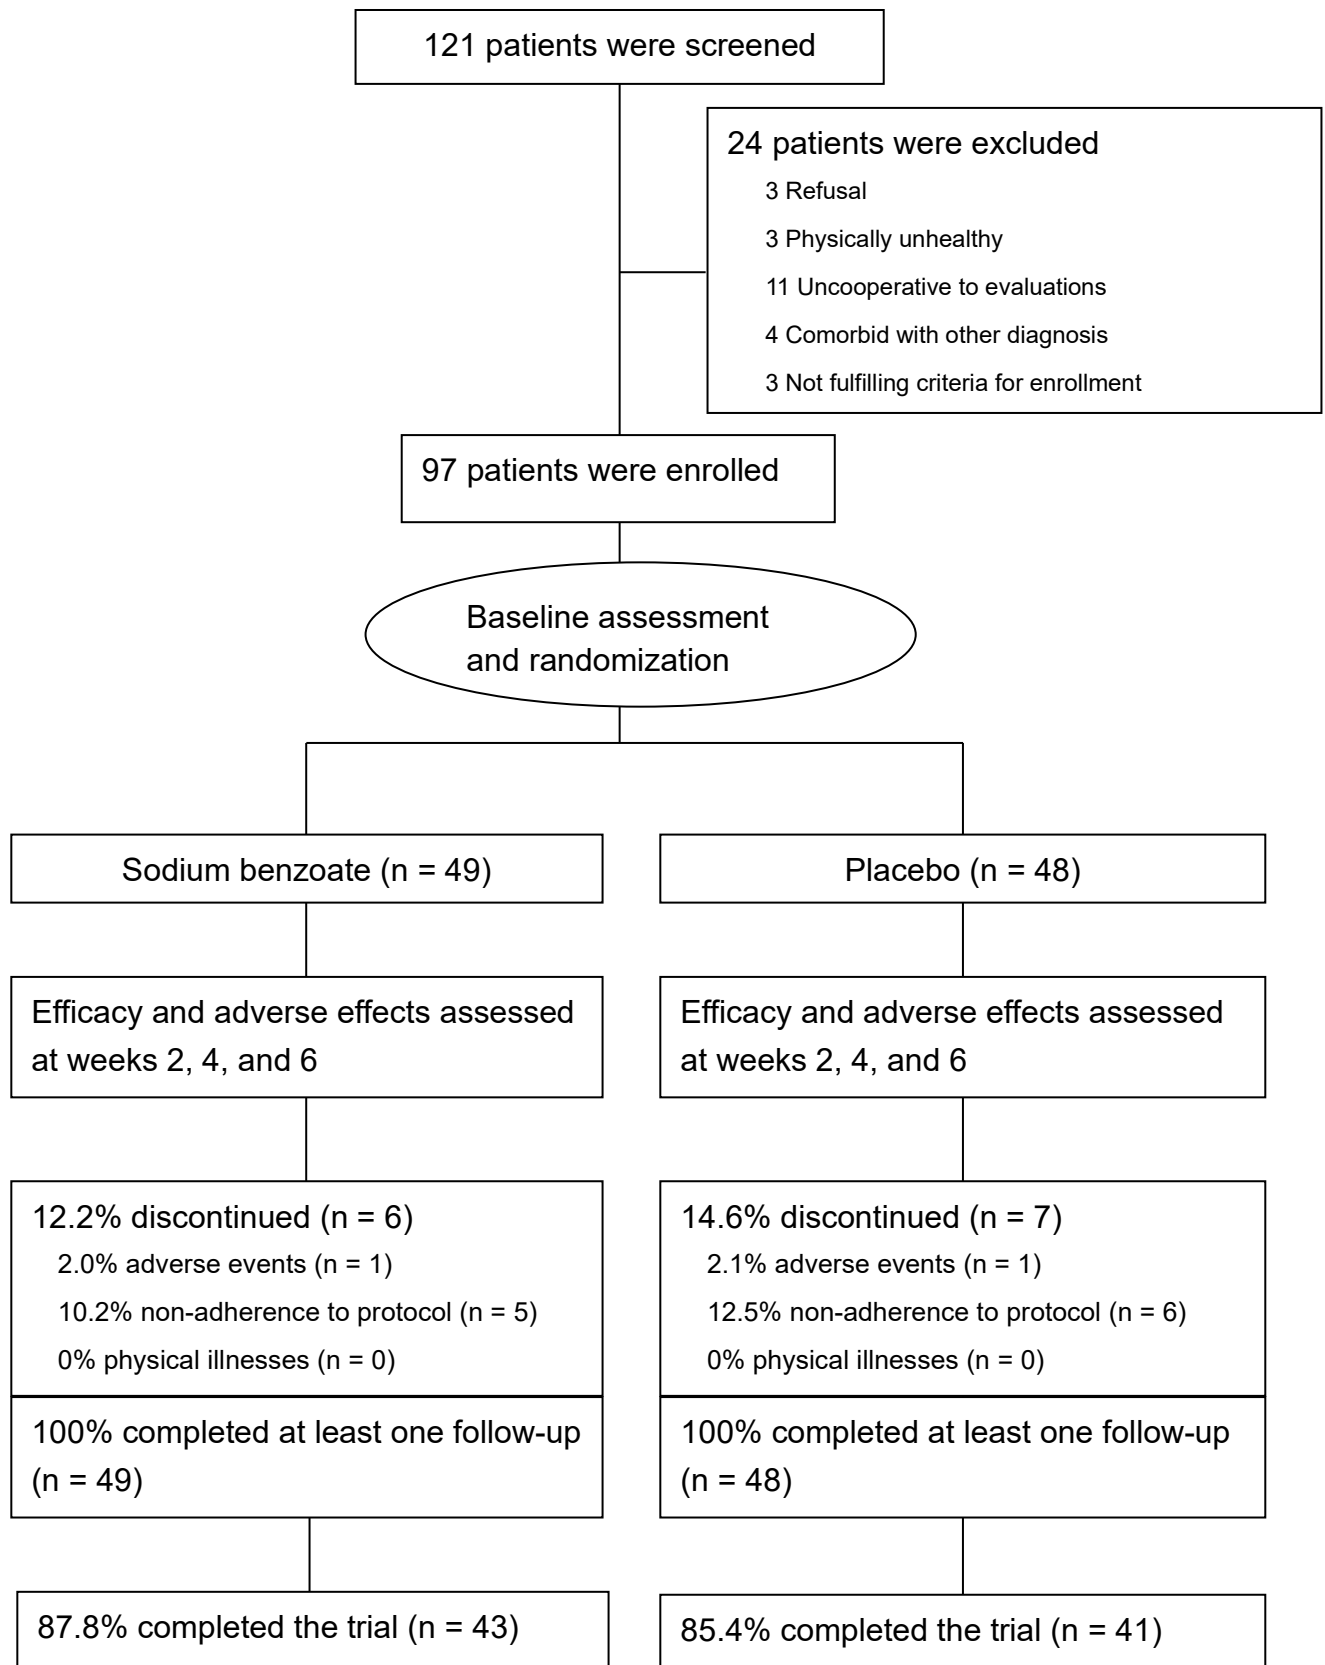

Supplement: jamanetwopen-e216156-s002.pdf [file jamanetwopen-e216156-s002.pdf]
