# Supplementary material for: Effect of Sodium Benzoate on Cognitive Function Among Patients With Behavioral and Psychological Symptoms of Dementia: Secondary Analysis of a Randomized Clinical Trial
Source: PubMed Central journal article supplement (PMC8060832; doi:10.1001/jamanetworkopen.2021.6156), 2021-04-21
Supplement: jamanetwopen-e216156-s003.pdf [file jamanetwopen-e216156-s003.pdf]

Lin C-H, Chen P-K, Wang S-H, Lane H-Y. Effect of sodium benzoate on cognitive function among patients with behavioral and psychological symptoms of dementia: secondary analysis of a randomized clinical trial. *JAMA Netw Open*. 2021;4(4):e216156. doi:10.1001/jamanetworkopen.2021.6156

## **Data Sharing Statement**

### **Data**

**Data available:** No

### **Additional Information**

**Explanation for why data not available:** The data will be available under request approved by IRB.
